CORRECTION

# Correction: A Novel Reproductive Mode in Frogs: A New Species of Fanged Frog with Internal Fertilization and Birth of Tadpoles

The *PLOS ONE* Staff

There is an error in the fifth sentence of the second paragraph within the Diagnosis sub-section of the Results section. The correct sentence is: *Limnonectes microtympenum* is moderately large (male SVL = 78.4; female SVL = 72.4 mm), and thus much larger than the new species. *Limnonectes microtympenum* also differs from the new species in having proportionally smaller tympana (TY/SVL = 0.05±0.01 in males, 0.06±0.01 in females versus 0.08±0.01 in both sexes in *L. larvaepartus*). The publisher apologizes for the error.

## Reference

1. Iskandar DT, Evans BJ, McGuire JA (2014) A Novel Reproductive Mode in Frogs: A New Species of Fanged Frog with Internal Fertilization and Birth of Tadpoles. PLoS ONE 9(12): e115884. doi: [10.1371/journal.pone.0115884](https://doi.org/10.1371/journal.pone.0115884) PMID: [25551466](https://pubmed.ncbi.nlm.nih.gov/25551466/)

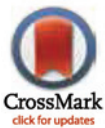

## OPEN ACCESS

**Citation:** The *PLOS ONE* Staff (2015) Correction: A Novel Reproductive Mode in Frogs: A New Species of Fanged Frog with Internal Fertilization and Birth of Tadpoles. PLoS ONE 10(3): e0119988. doi:10.1371/journal.pone.0119988

**Published:** March 16, 2015

**Copyright:** © 2015 The PLOS ONE Staff. This is an open access article distributed under the terms of the [Creative Commons Attribution License](https://creativecommons.org/licenses/by/4.0/), which permits unrestricted use, distribution, and reproduction in any medium, provided the original author and source are credited.
